# Supplementary material
Source: Springer Nature journal article supplement (https://www.springermedizin.de/resource/supplementary/12874_2010_549_MOESM3_ESM.pdf/9432448)

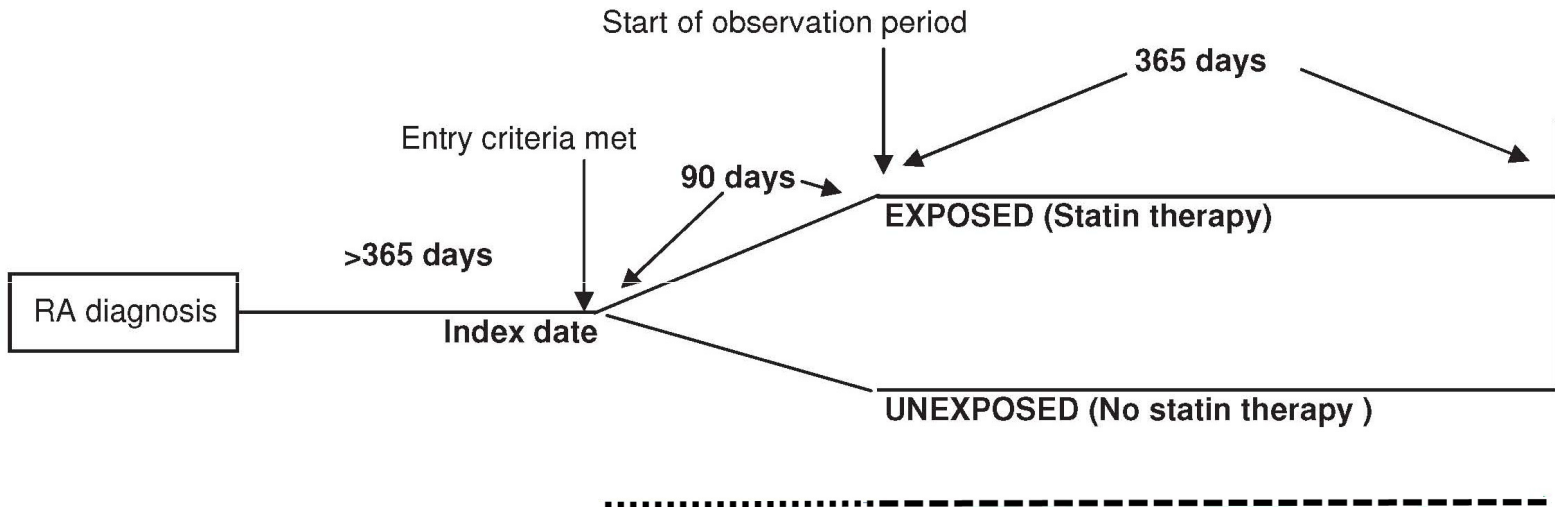

TIME

- ..... Drug exposure period (90 days)
- Observation period (365 days)

Supplement: MOESM3 [file 9432448]
